# Supplementary material
Source: publisher figshare collection journal article supplement (https://tandf.figshare.com/ndownloader/files/18018518)
Supplement: Supplementary file 1 [file 18018518]

Appendix A. Type or class of “Other” agents

| Exposure agents | N |
| --- | --- |
| Anticoagulant | 3 |
| Solvent | 3 |
| Antiepileptics | 2 |
| Antineoplastic | 2 |
| Hypoglycemic | 2 |
| Phosphorus | 2 |
| Antibiotic | 1 |
| Hallucinogen | 1 |
| Metal | 1 |
| Smoke | 1 |
| Propionic acid | 1 |
| Carbon monoxide | 1 |
| 4-aminophenol | 1 |
| Psychostimulant | 1 |
| Tranquilizer | 1 |
